# Supplementary material for: Mental health problems, needs, and service use among people living within and outside Wuhan during the COVID-19 epidemic in China
Source: PubMed Central journal article supplement — Ann Transl Med. 2020 Nov;8(21):1392. doi: 10.21037/atm-20-4145 (PMC7723535; doi:10.21037/atm-20-4145), 2020-11
Supplement: atm-08-21-1392-supplementary.pdf [file atm-08-21-1392-supplementary.pdf]

**Table S1** Results of multiple logistic regression analyses on factors associated with mental health problems of Chinese residents

| Characteristics                                                     | Sub-character                | Psychological distress |        | Depressive symptoms |        | Anxiety symptoms    |        |
|---------------------------------------------------------------------|------------------------------|------------------------|--------|---------------------|--------|---------------------|--------|
|                                                                     |                              | Odds Ratio (95% CI)    | P      | Odds Ratio (95% CI) | P      | Odds Ratio (95% CI) | P      |
| Subpopulation                                                       | Wuhan residents              | 1.97 (1.70, 2.29)      | <0.001 | 1.79 (1.52, 2.10)   | <0.001 | 1.61 (1.37, 1.90)   | <0.001 |
|                                                                     | Migrants from Wuhan          | 2.04 (1.73, 2.41)      | <0.001 | 1.93 (1.62, 2.31)   | <0.001 | 1.56 (1.30, 1.87)   | <0.001 |
|                                                                     | Other Hubei residents        | 1.26 (1.02, 1.55)      | 0.029  | 1.27 (1.02, 1.59)   | 0.036  | 1.13 (0.89, 1.42)   | 0.311  |
|                                                                     | Other residents              | 1                      |        | 1                   |        | 1                   |        |
| Gender                                                              | Female                       | 1.41 (1.26, 1.57)      | <0.001 | 1.39 (1.23, 1.57)   | <0.001 | 1.21 (1.07, 1.37)   | 0.002  |
|                                                                     | Male                         | 1                      |        | 1                   |        | 1                   |        |
| Age-group (years)                                                   | 16-29                        | 1.50 (1.16, 1.94)      | 0.002  | 2.15 (1.60, 2.89)   | <0.001 | 1.80 (1.33, 2.43)   | <0.001 |
|                                                                     | 30-49                        | 1.58 (1.26, 1.97)      | <0.001 | 2.22 (1.71, 2.88)   | <0.001 | 1.76 (1.36, 2.30)   | <0.001 |
|                                                                     | 50+                          | 1                      |        | 1                   |        | 1                   |        |
| Marital status                                                      | Others*                      | 1.07 (0.91, 1.25)      | 0.44   | 1.09 (0.92, 1.29)   | 0.349  | 1.49 (1.26, 1.78)   | <0.001 |
|                                                                     | Never-married                | 1.34 (1.05, 1.70)      | 0.018  | 1.19 (0.92, 1.54)   | 0.197  | 1.45 (1.12, 1.88)   | 0.005  |
|                                                                     | Married                      | 1                      |        | 1                   |        | 1                   |        |
| Employment status                                                   | Students                     | 1.65 (1.32, 2.05)      | <0.001 | 1.99 (1.58, 2.50)   | <0.001 | 1.90 (1.50, 2.39)   | <0.001 |
|                                                                     | Unemployed                   | 0.84 (0.71, 1.01)      | 0.054  | 0.86 (0.71, 1.04)   | 0.120  | 0.90 (0.75, 1.08)   | 0.256  |
|                                                                     | Employed                     | 1                      |        | 1                   |        | 1                   |        |
| Education                                                           | Associate's degree and above | 1.87 (1.59, 2.20)      | <0.001 | 1.78 (1.49, 2.12)   | <0.001 | 1.54 (1.29, 1.83)   | <0.001 |
|                                                                     | Middle school and below      | 1                      |        | 1                   |        | 1                   |        |
| Perceived severity of the epidemic in current residence place       | Severe                       | 1.32 (1.16, 1.51)      | <0.001 | 1.29 (1.12, 1.48)   | <0.001 | 1.30 (1.12, 1.50)   | <0.001 |
|                                                                     | Not severe                   | 1                      |        | 1                   |        | 1                   |        |
| Having family members or close relatives infected with SARS-CoV-2** | Yes                          | 1.19 (0.77, 1.84)      | 0.441  | 1.71 (1.11, 2.63)   | 0.015  | 1.29 (0.83, 2.00)   | 0.267  |
|                                                                     | No                           | 1                      |        | 1                   |        | 1                   |        |
| Having colleagues, friends or classmates infected with SARS-CoV-2** | Yes                          | 1.96 (1.65, 2.33)      | <0.001 | 1.63 (1.36, 1.94)   | <0.001 | 1.69 (1.41, 2.03)   | <0.001 |
|                                                                     | No                           | 1                      |        | 1                   |        | 1                   |        |
| Having infected neighbors of the same community/village             | Yes                          | 1.60 (1.36, 1.87)      | <0.001 | 1.53 (1.29, 1.80)   | <0.001 | 1.43 (1.21, 1.70)   | <0.001 |
|                                                                     | No                           | 1                      |        | 1                   |        | 1                   |        |

\*, "Others" included re-married, co-habiting, separated, divorced, and widowed. \*\*, SARS-CoV-2: Severe Acute Respiratory Syndrome Coronavirus 2.

**Table S2** Results of multiple logistic regression analyses on factors associated with perceived need for mental health care and mental health service use of Chinese residents

| Characteristic                                                      | Sub-character                | Perceived need for mental health care |        | Use of mental health services |        |
|---------------------------------------------------------------------|------------------------------|---------------------------------------|--------|-------------------------------|--------|
|                                                                     |                              | OR (95%CI)                            | P      | OR (95%CI)                    | P      |
| Subpopulation                                                       | Wuhan residents              | 0.87 (0.66, 1.15)                     | 0.329  | 1.24 (0.69, 2.23)             | 0.463  |
|                                                                     | Migrants from Wuhan          | 0.87 (0.65, 1.18)                     | 0.378  | 1.14 (0.62, 2.11)             | 0.670  |
|                                                                     | Other Hubei residents        | 0.88 (0.59, 1.30)                     | 0.510  | 1.03 (0.44, 2.39)             | 0.950  |
|                                                                     | Other residents              | 1                                     |        | 1                             |        |
| Gender                                                              | Female                       | 1.35 (1.10, 1.67)                     | 0.005  | 0.74 (0.49, 1.12)             | 0.150  |
|                                                                     | Male                         | 1                                     |        | 1                             |        |
| Age-group (years)                                                   | 16-29                        | 1.08 (0.68, 1.73)                     | 0.745  | 0.34 (0.12, 0.94)             | 0.038  |
|                                                                     | 30-49                        | 1.03 (0.69, 1.55)                     | 0.881  | 0.70 (0.30, 1.61)             | 0.401  |
|                                                                     | 50+                          | 1                                     |        | 1                             |        |
| Marital status                                                      | Others*                      | 0.88 (0.66, 1.17)                     | 0.367  | 2.00 (1.08, 3.69)             | 0.027  |
|                                                                     | Never-married                | 2.08 (1.45, 2.99)                     | <0.001 | 2.46 (1.20, 5.02)             | 0.014  |
|                                                                     | Married                      | 1                                     |        | 1                             |        |
| Employment status                                                   | Students                     | 0.90 (0.62, 1.30)                     | 0.580  | 0.35 (0.11, 1.18)             | 0.091  |
|                                                                     | Unemployed                   | 0.96 (0.70, 1.31)                     | 0.778  | 1.98 (1.06, 3.73)             | 0.033  |
|                                                                     | Employed                     | 1                                     |        | 1                             |        |
| Education                                                           | Associate's degree and above | 0.87 (0.66, 1.16)                     | 0.335  | 0.80 (0.46, 1.40)             | 0.436  |
|                                                                     | Middle school and below      | 1                                     |        | 1                             |        |
| Perceived severity of the epidemic in current residence place       | Severe                       | 0.95 (0.74, 1.21)                     | 0.654  | 0.73 (0.44, 1.22)             | 0.226  |
|                                                                     | Not severe                   | 1                                     |        | 1                             |        |
| Having family members or close relatives infected with SARS-CoV-2** | Yes                          | 0.37 (0.16, 0.85)                     | 0.019  | 0.76 (0.17, 3.29)             | 0.708  |
|                                                                     | No                           | 1                                     |        | 1                             |        |
| Having colleagues, friends or classmates infected with SARS-CoV-2** | Yes                          | 1.32 (1.01, 1.74)                     | 0.045  | 1.71 (0.99, 2.97)             | 0.056  |
|                                                                     | No                           | 1                                     |        | 1                             |        |
| Having infected neighbors living in the same community/village      | Yes                          | 1.11 (0.85, 1.45)                     | 0.426  | 1.03 (0.58, 1.81)             | 0.927  |
|                                                                     | No                           | 1                                     |        | 1                             |        |
| Psychological distress                                              | Yes                          | 2.08 (1.61, 2.68)                     | <0.001 | 1.62 (0.93, 2.83)             | 0.088  |
|                                                                     | No                           | 1                                     |        | 1                             |        |
| Anxiety symptoms                                                    | Yes                          | 3.17 (2.45, 4.10)                     | <0.001 | 1.73 (0.98, 3.05)             | 0.059  |
|                                                                     | No                           | 1                                     |        | 1                             |        |
| Depressive symptoms                                                 | Yes                          | 4.14 (3.29, 5.21)                     | <0.001 | 4.70 (2.73, 8.10)             | <0.001 |
|                                                                     | No                           | 1                                     |        | 1                             |        |

\*, "Others" included re-married, co-habiting, separated, divorced, and widowed. \*\*, SARS-CoV-2: Severe Acute Respiratory Syndrome Coronavirus 2.
